# Supplementary material
Source: publisher figshare collection journal article supplement (https://sage.figshare.com/ndownloader/files/20187726)
Supplement: Supplementary file 1 [file 20187726]

**Supplement Table 3: Frequency of Dexmedetomidine Usage by Age at Surgery**

| **All ages** | **Overall** | | **Dexemetetomidine use=Yes** | | **Dexemetetomidine use=No** | |
| --- | --- | --- | --- | --- | --- | --- |
|  | **N** | **%** | **N** | **%** | **N** | **%** |
| Neonate (0-30 days) | 25948 | 19.37 | 4274 | 16.47 | 21674 | 83.53 |
| Infant (31 days 1 year) | 40885 | 30.52 | 13185 | 32.25 | 27700 | 67.75 |
| Toddler (1 year – 3 year) | 20328 | 15.17 | 7605 | 37.41 | 12723 | 62.59 |
| Child (4 year - 11 year) | 21886 | 16.34 | 7390 | 33.77 | 14496 | 66.23 |
| Adolescent  (12 year - 17 year) | 15245 | 11.38 | 4201 | 27.56 | 11044 | 72.44 |
| Adult (18 years +) | 9675 | 7.22 | 2639 | 27.28 | 7036 | 72.72 |
